# Supplementary material for: A Stress-Activated Transposon in Arabidopsis Induces Transgenerational Abscisic Acid Insensitivity
Source: PubMed Central journal article supplement (PMC4791638; doi:10.1038/srep23181), 2016-03-15
Supplement: srep23181-s1.pdf [file srep23181-s1.pdf]

A Stress-Activated Transposon in *Arabidopsis* Induces Transgenerational Abscisic Acid Insensitivity

Hidetaka Ito<sup>1\*</sup>, Jong-Myong Kim<sup>2</sup>, Wataru Matsunaga<sup>1</sup>, Hidetoshi Saze<sup>3</sup>, Akihiro Matsui<sup>2</sup>, Takaho A. Endo<sup>4</sup>, Yoshiko Harukawa<sup>3</sup>, Hiroki Takagi<sup>5</sup>, Yaegashi Hiroki<sup>5</sup>, Yukari Masuta<sup>1</sup>, Seiji Masuda<sup>1</sup>, Junko Ishida<sup>2</sup>, Maho Tanaka<sup>2</sup>, Satoshi Takahashi<sup>2,7</sup>, Taeko Morosawa<sup>2</sup>, Tetsuro Toyoda<sup>5</sup>, Tetsuji Kakutani<sup>6</sup>, Atsushi Kato<sup>1</sup>, Motoaki Seki<sup>2,7,8</sup>

<sup>1</sup>Faculty of Science, Hokkaido University, Sapporo 060-0810, Japan. <sup>2</sup>Plant Genomic Network Research Team, RIKEN Center for Sustainable Resource Science, Yokohama 230-0045, Japan. <sup>3</sup>Okinawa Institute of Science and Technology, Onna-son, 904-0495, Japan. <sup>4</sup>RIKEN IMS-RCAI, Yokohama 230-0045, Japan. Iwate Biotechnology Research Center, Kitakami 024-0003, Japan. <sup>5</sup>RIKEN Advanced Center for Computing and Communication, Wako 351-0198, Japan. <sup>6</sup>National Institute of Genetics, Mishima 411-8540, Japan. <sup>7</sup>Kihara Institute for Biological Research, Yokohama City University, Yokohama 244-0813, Japan. <sup>8</sup>Core Research for Evolutional Science and Technology, Japan Science and Technology, Kawaguchi 332-0012, Japan

\*The contact information for the corresponding author:

Kita10 Nishi8, Kita-ku, Sapporo, Hokkaido

060-0810, Japan

[hito@mail.sci.hokudai.ac.jp](mailto:hito@mail.sci.hokudai.ac.jp)

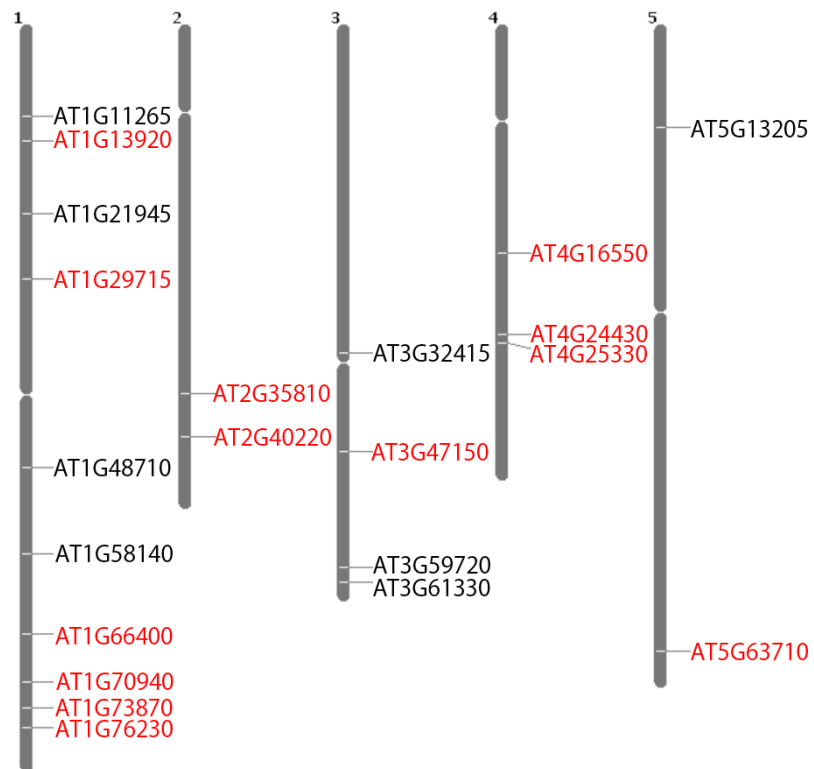

Supplementary Figure S1

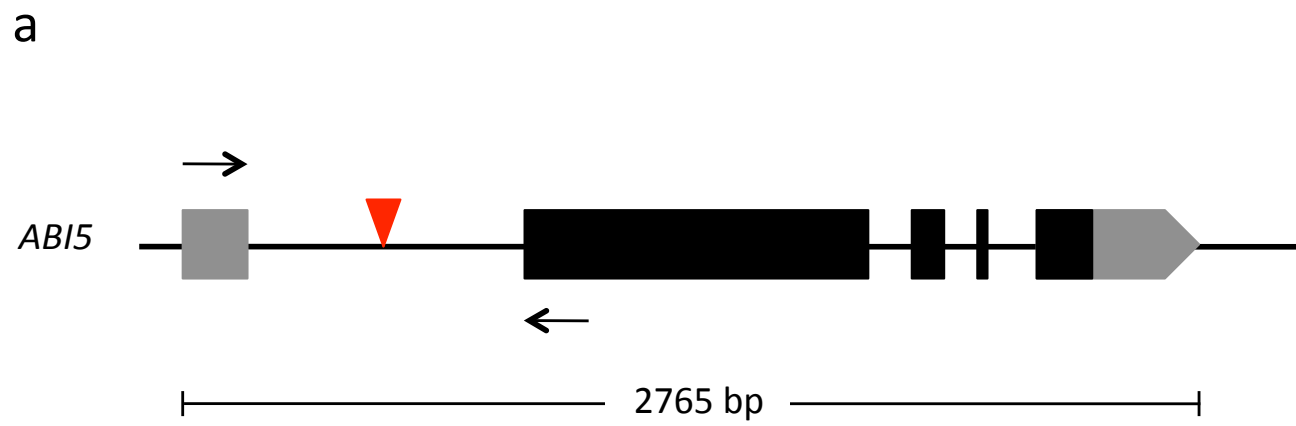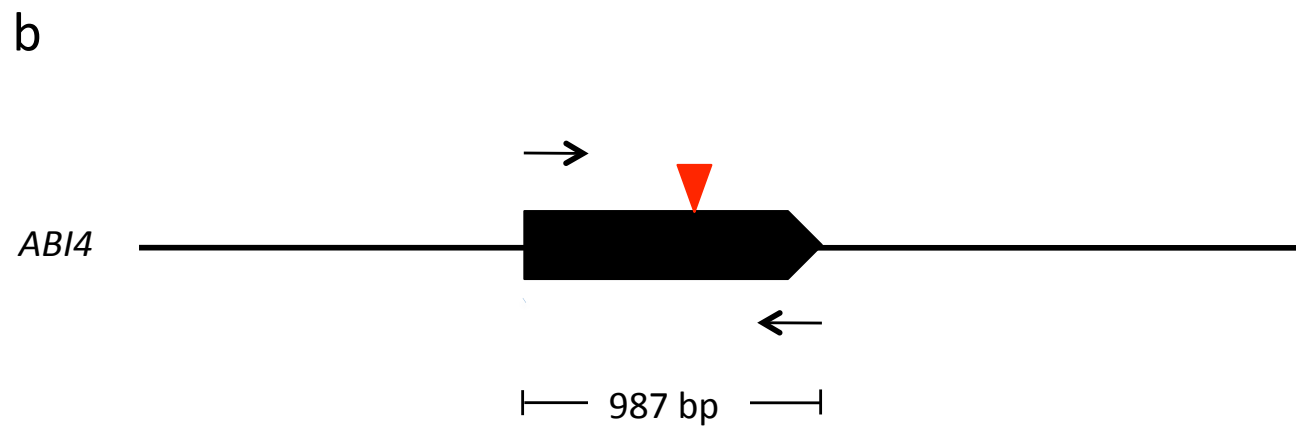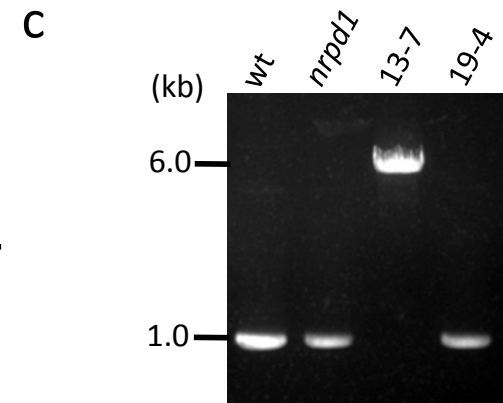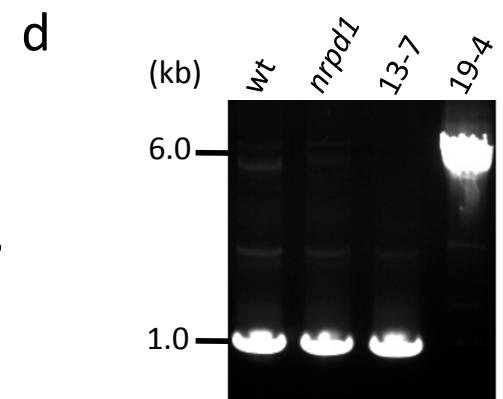

Supplementary Figure S2



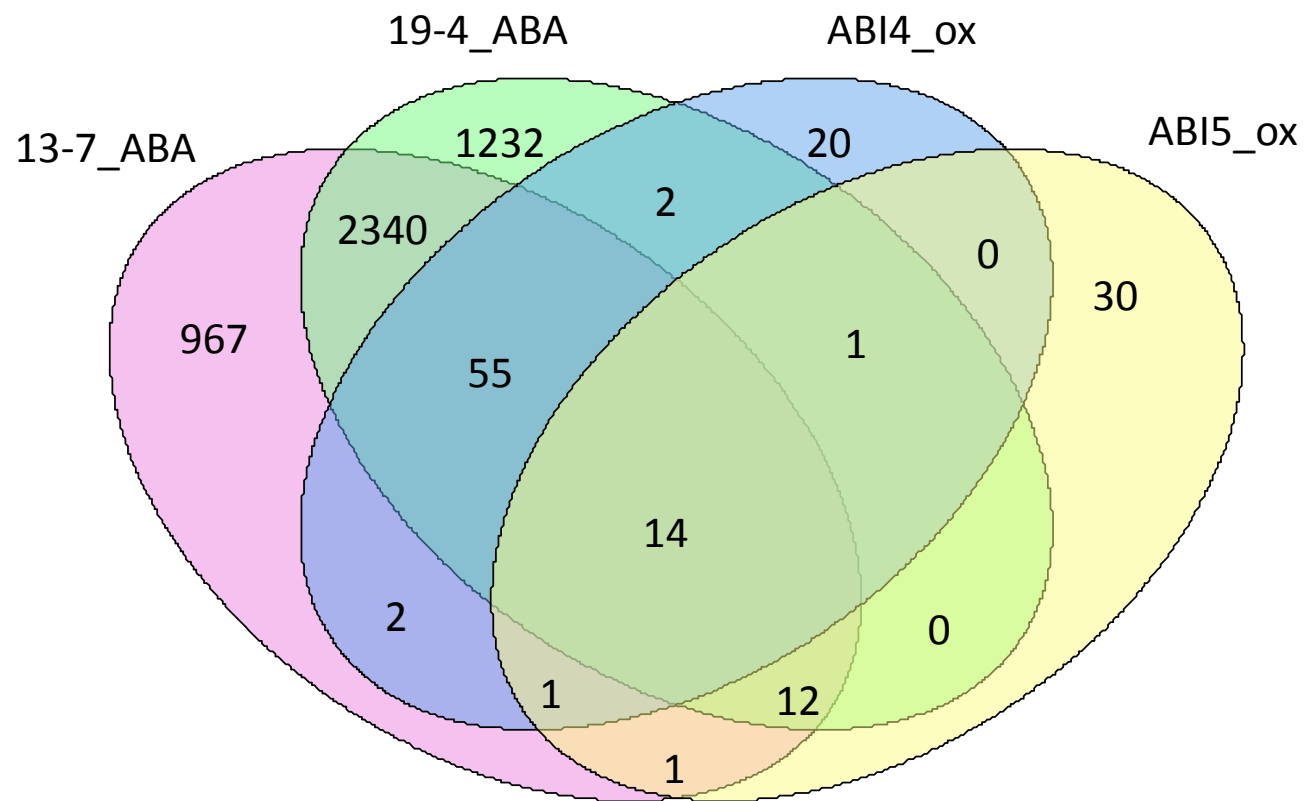

Supplementary Figure S4

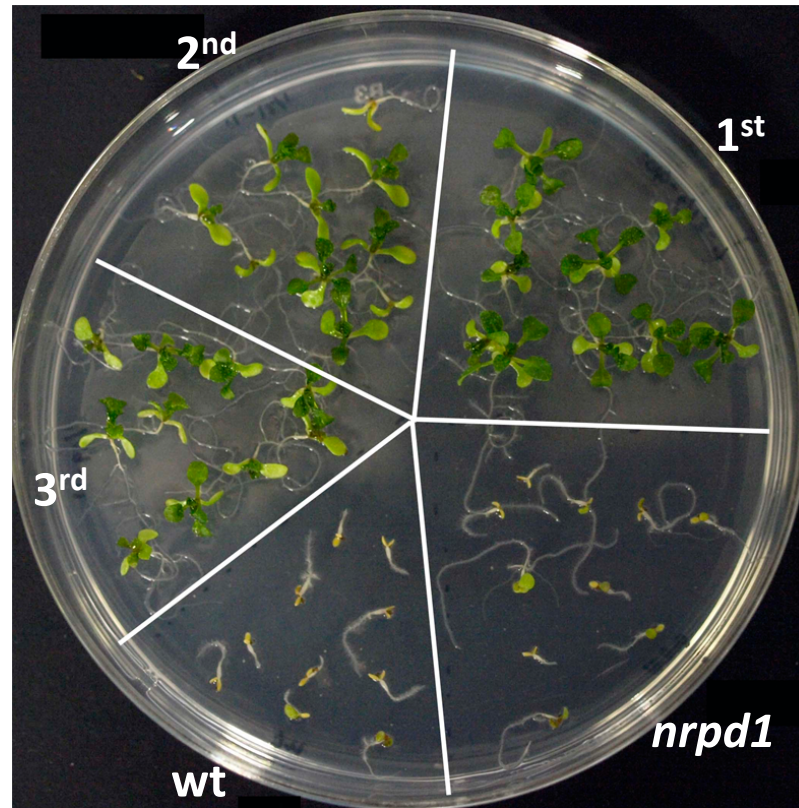

Supplementary Figure S5

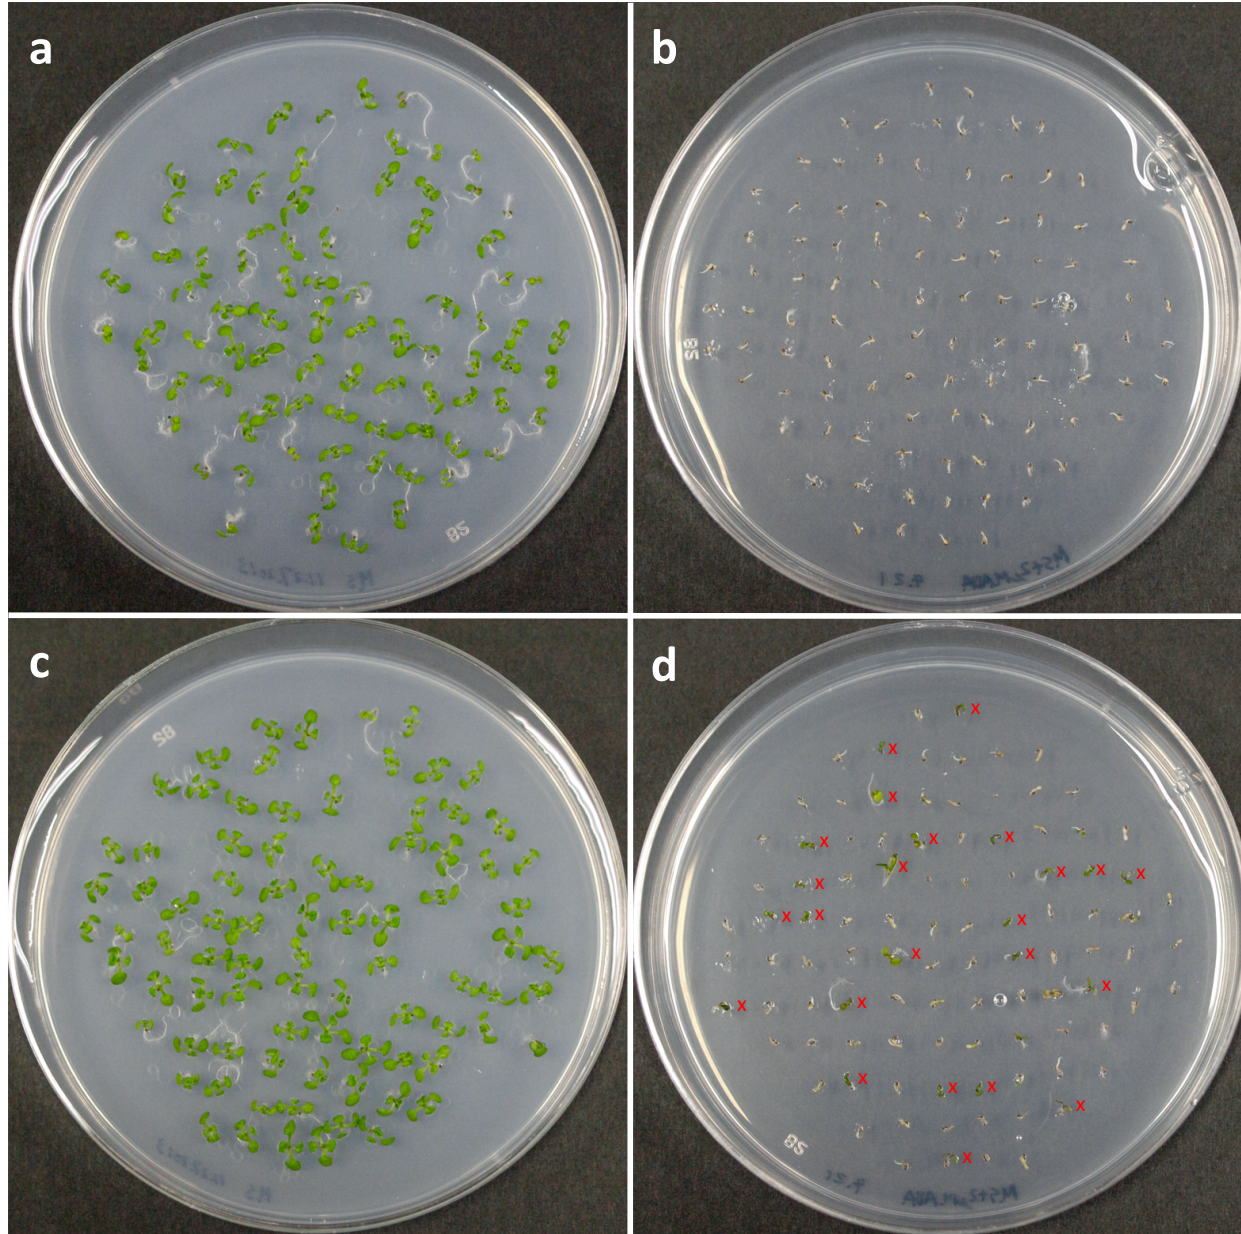

Supplementary Figure S6



a

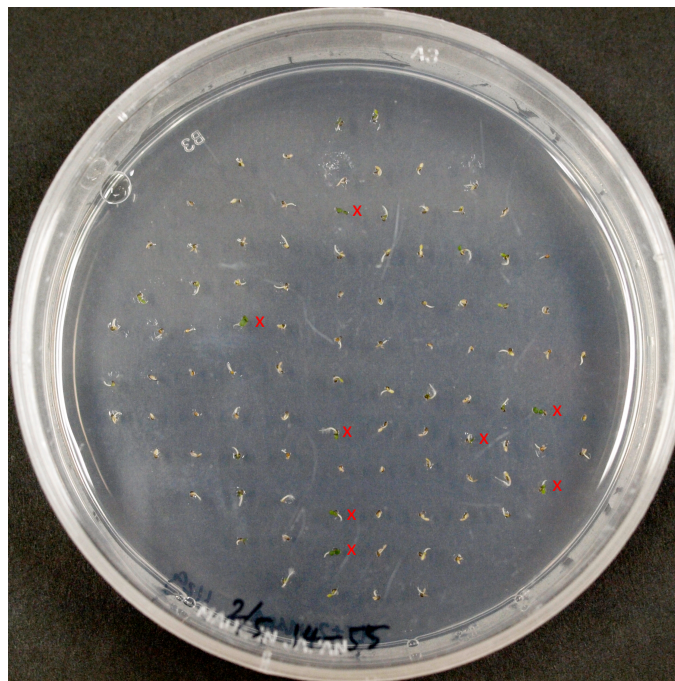

b

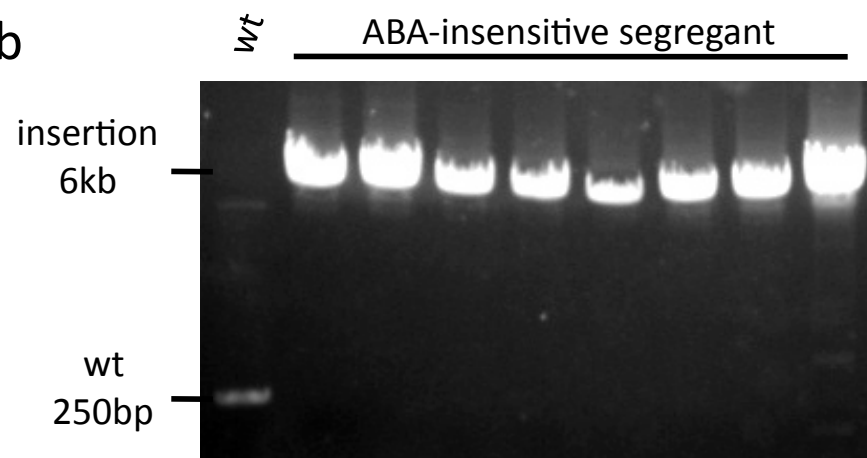

Supplementary Figure S7

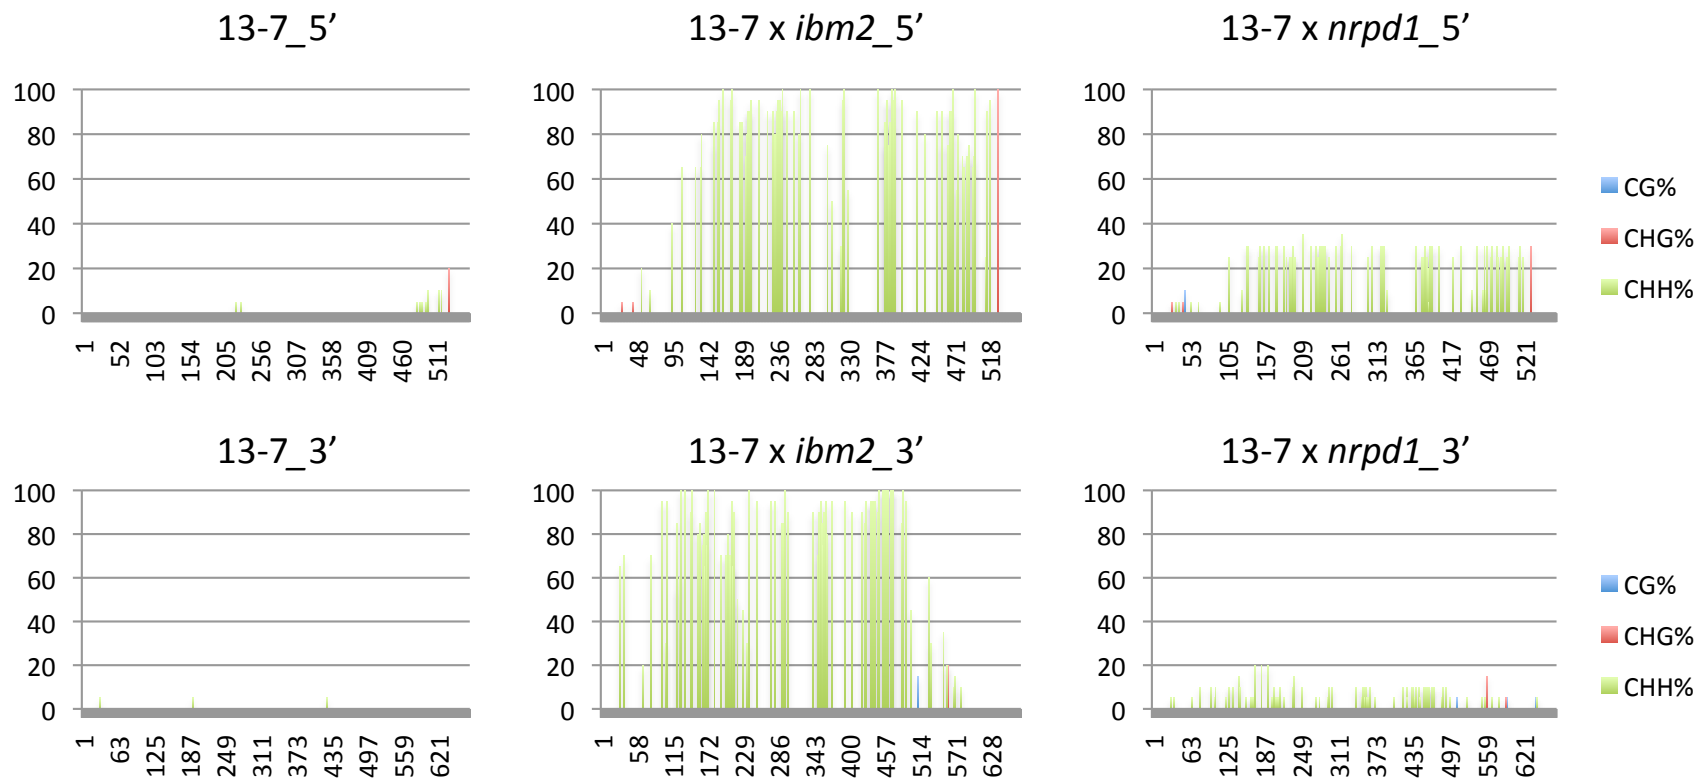

Supplementary Figure S8

Supplementary Figure S1.

Mapping of *ONSEN*-integrated genes in 19-4. Thirteen new insertions were identified within genes. The loci names with red letters indicate the new insertions and the black letters indicate the original eight *ONSEN* copies.

Supplementary Figure S2.

An *ONSEN* insertion in 13-7 and 19-4. (a, b) *ONSEN* insertion in the first intron of *ABI5* in 13-7 (a) and an exon of *ABI4* in 19-4 (b). The red arrowheads indicate the *ONSEN* insertion loci. Black arrows indicate the primer sites used for PCR. (c, d) PCR amplification of *ONSEN* in 13-7 (c) and in 19-4 (d). wt, wild type; *nrapd1*, original *nrapd1* mutant line.

Supplementary Figure S3. A 700-bp sequence of the LTR and the gene-coding region of *ONSEN*. The first eight gene IDs refer to the original, endogenous *ONSEN* copies. 13-7 and 19-4 represent the sequences of newly inserted *ONSEN* copies within *ABI5* and *ABI4*, respectively. The nucleotides marked blue and red color indicated the polymorphisms to make the identification of 13-7 and 19-4 respectively.

Supplementary Figure S4. Venn diagram of differentially expressed genes in 13-7 and 19-4 lines from our microarray analysis, and *ABI4*<sup>-</sup> and *ABI5*<sup>-</sup> direct target genes in *ABI4*<sup>-</sup> and *ABI5*<sup>-</sup> overexpressed seedlings from public microarray data. Microarray analysis identified significant differentially expressed genes of 13-7 and 19-4, compared with parental *nrapd1* under ABA treatment (Expression change was 1.5-fold or 0.67-fold, FDR < 0.05). The *ABI4*<sup>-</sup> and *ABI5*<sup>-</sup> direct target genes were used from the Supplementary material 2 of previous report (37).

Supplementary Figure S5. An ABA-insensitive phenotype of self-fertilized 13-7 progeny on 2  $\mu$ M ABA. 1<sup>st</sup>, 2<sup>nd</sup>, 3<sup>rd</sup>: the generation of self-fertilized progeny.

Supplementary Figure S6.

Phenotypes of the F2 population derived from a single F1 progeny of a cross between an ABA-insensitive mutant (13-7 or 19-4) and a wild-type plant. (a, b) F2 phenotype

(cross between 13-7 and wild type) growing under normal conditions (a) and under 2  $\mu\text{M}$  ABA (b). (c, d) F2 phenotype (cross between 19-4 and wild type) growing under normal conditions (c) and under 2  $\mu\text{M}$  ABA (d). Red crosses indicate ABA-insensitive phenotypes (24 out of 100 seedlings).

Supplementary Figure S7.

Phenotypes and *ONSEN* insertion of the F2 population derived from a single F1 progeny of a cross between 13-7 and *nRPD1*. (a) Eight seedlings showed ABA-insensitive phenotypes growing under 2  $\mu\text{M}$  ABA (red crosses). (b) *ONSEN* insertion was detected by PCR. PCR primers were designed to amplify a 250 bp region of the first intron of *ABI5*. The eight ABA-insensitive segregant were correlated with the marked seedlings in (a).

Supplementary Figure S8. Bisulfite sequence analysis of 5' and 3' flanking regions of the *ONSEN* insertion in 13-7 and the F1 hybrid between 13-7 and an *IBM2* mutant or between 13-7 and a *NRPD1* mutant.

Supplementary Table S1. Mapping of *ONSEN* new insertions in 13-7.

| Chromosome | Gene       | Start    | End      | Direction | Gene direction | Exon/Intron |
|------------|------------|----------|----------|-----------|----------------|-------------|
| 1          | AT1G03400  | 843611   | 843644   | -         | -              | Intron      |
| 1          | AT1G30790  | 10933742 | 10933800 | +         | +              | Exon        |
| 1          | AT1G58400  | 21696494 | 21696557 | -         | -              | Exon        |
| 1          | AT1G66050  | 24591439 | 24591487 | -         | +              | Exon        |
| 2          | AT2G02700  | 757522   | 757558   | -         | -              | Exon        |
| 2          | Centromere | 3189065  | 3189255  | -         | NA             | NA          |
| 2          | NA         | 10540220 | 10540272 | +         | NA             | NA          |
| 2          | NA         | 11822642 | 11822706 | -         | NA             | NA          |
| 2          | AT2G36270  | 15207129 | 15207251 | -         | -              | Intron      |
| 2          | AT2G43570  | 18077261 | 18077329 | +         | -              | Exon        |
| 3          | AT3G01015  | 3182     | 3239     | -         | -              | Exon/Intron |
| 3          | AT3G04945  | 1369214  | 1369286  | +         | -              | Exon        |
| 3          | AT3G13810  | 4545286  | 4545381  | -         | +              | Intron      |
| 3          | AT3G19500  | 6760170  | 6760193  | -         | -              | Exon        |
| 3          | AT3G25180  | 9168023  | 9168068  | -         | -              | Exon        |
| 4          | AT4G01930  | 838873   | 838932   | -         | -              | Exon        |
| 4          | AT4G23160  | 12131610 | 12131648 | +         | +              | Exon        |
| 5          | AT5G02160  | 426463   | 426503   | +         | +              | Exon        |
| 5          | NA         | 5347645  | 5347689  | -         | NA             | NA          |
| 5          | AT5G38550  | 15435629 | 15435656 | -         | -              | Intron      |
| 5          | AT5G54067  | 21941797 | 21941852 | -         | -              | 3'UTR       |
| 5          | AT5G59070  | 23845240 | 23845295 | +         | +              | Exon        |
| 5          | AT5G59590  | 24009802 | 24009956 | +         | -              | Exon        |
| 5          | AT5G65310  | 26103267 | 26103351 | -         | -              | Intron      |

Start and End show the mapped position of *ONSEN* reads.

Direction and Gene direction show the polarity of *ONSEN* and the inserted gene respectively. +; sense strand, -; antisense strand.

Exon/Intron show the definition of a gene region that *ONSEN* is inserted.

Supplementary Table S2. Mapping of *ONSEN* new insertions in 19-4.

| Chromosome | Gene       | Start    | End      | Direction | Gene direction | Exon/Intron |
|------------|------------|----------|----------|-----------|----------------|-------------|
| 1          | AT1G13920  | 4759156  | 4759344  | +         | +              | Exon        |
| 1          | AT1G29715  | 10389155 | 10389365 | +         | -              | Exon        |
| 1          | AT1G66400  | 24771163 | 24771369 | +         | -              | Exon        |
| 1          | AT1G70940  | 26744168 | 26744373 | -         | +              | Exon        |
| 1          | AT1G73870  | 27779109 | 27779240 | +         | +              | 5'UTR       |
| 1          | AT1G76230  | 28600391 | 28600573 | -         | -              | 5'UTR       |
| 2          | NA         | 2780595  | 2781605  | +         | NA             | NA          |
| 2          | NA         | 3189039  | 3189325  | -         | NA             | NA          |
| 2          | Centromere | 3614998  | 3627989  | +         | NA             | NA          |
| 2          | NA         | 9711470  | 9711513  | -         | NA             | NA          |
| 2          | AT2G35810  | 15049384 | 15049570 | +         | +              | Intron      |
| 2          | AT2G40220  | 16796815 | 16797021 | -         | -              | Exon        |
| 3          | NA         | 11654581 | 11654770 | -         | NA             | NA          |
| 3          | NA         | 13540137 | 13540245 | +         | NA             | NA          |
| 3          | NA         | 14403089 | 14403901 | +         | NA             | NA          |
| 3          | AT3G47150  | 17358636 | 17358814 | +         | +              | Exon        |
| 4          | AT4G16550  | 9320354  | 9320402  | +         | -              | Intron      |
| 4          | AT4G24430  | 12631841 | 12632026 | -         | +              | Exon/Intron |
| 4          | AT4G25330  | 12958068 | 12958209 | +         | +              | Exon        |
| 5          | AT5G63710  | 25502730 | 25502862 | -         | +              | 3'UTR       |
| 5          | NA         | 26111680 | 26111847 | +         | NA             | NA          |

Start and End show the mapped position of *ONSEN* reads.

Direction and Gene direction show the polarity of *ONSEN* and the inserted gene respectively. +; sense strand, -; antisense strand.

Exon/Intron show the definition of a gene region that *ONSEN* is inserted.

Supplementary Table S3. The properties of the *ONSEN* targeted genes.

| Gene_id        | Gene length (bp) | Exon number | Exon length (bp) | Intron length (bp) |
|----------------|------------------|-------------|------------------|--------------------|
| AT1G03400.1    | 1444             | 3           | 1056             | 208                |
| AT1G30790.1    | 1354             | 1           | 1200             | 0                  |
| AT1G58400.1    | 2954             | 3           | 2703             | 251                |
| AT1G66050.1    | 3261             | 9           | 1872             | 1211               |
| AT2G02700.1    | 1500             | 1           | 1500             | 0                  |
| AT2G36270.1    | 2765             | 4           | 1329             | 1045               |
| AT2G43570.1    | 1240             | 2           | 834              | 213                |
| AT3G01015.1    | 2507             | 8           | 1467             | 753                |
| AT3G04945.1    | 419              | 2           | 231              | 188                |
| AT3G13810.1    | 2921             | 3           | 1542             | 818                |
| AT3G13810.2    | 3150             | 4           | 1545             | 1252               |
| AT3G13810.3    | 3150             | 4           | 1503             | 1269               |
| AT3G19500.1    | 1924             | 5           | 813              | 792                |
| AT3G25180.1    | 1998             | 3           | 1548             | 280                |
| AT3G25180.2    | 1996             | 2           | 1209             | 173                |
| AT4G01930.1    | 1959             | 1           | 1959             | 0                  |
| AT4G23160.1    | 4703             | 10          | 3789             | 813                |
| AT5G02160.1    | 1072             | 2           | 390              | 243                |
| AT5G38550.1    | 2999             | 5           | 1785             | 925                |
| AT5G54067.1    | 545              | 1           | 381              | 0                  |
| AT5G59070.1    | 2196             | 2           | 1518             | 575                |
| AT5G59590.1    | 1667             | 2           | 1350             | 84                 |
| AT5G65310.1    | 2655             | 3           | 939              | 822                |
| AT5G65310.2    | 1973             | 2           | 885              | 513                |
| AT1G13920.1    | 1567             | 7           | 1038             | 529                |
| AT1G66400.1    | 797              | 1           | 474              | 0                  |
| AT1G70940.1    | 3342             | 6           | 1923             | 779                |
| AT1G73870.1    | 1511             | 2           | 1179             | 130                |
| AT1G76230.1    | 683              | 1           | 390              | 0                  |
| AT2G35810.1    | 1174             | 3           | 600              | 316                |
| AT2G40220.1    | 987              | 1           | 987              | 0                  |
| AT3G47150.1    | 1175             | 2           | 1083             | 92                 |
| AT4G16550.1    | 5813             | 16          | 2232             | 3581               |
| AT4G24430.1    | 3058             | 13          | 1941             | 1017               |
| AT4G25330.1    | 881              | 3           | 690              | 160                |
| AT5G63710.1    | 3385             | 11          | 1845             | 1279               |
| Average        | 2131.25          | 4.11        | 1325.83          | 564.19             |
| Genome Average | 2350.77          | 5.04        | 1110.31          | 965.24             |
| FTEST          | 1.39E-02         | 7.68E-03    | 3.77E-02         | 3.58E-04           |
| TTEST          | 2.72E-01         | 1.39E-01    | 7.77E-02         | *1.04E-03          |

\* Significant difference  $p < 0.05$

Supplementary Table S4. Comparison of the gene expressions of *ONSEN* inserted loci in wild type and *nrrpd2* under heat stress.

| 13_7<br>Inserted loci | Log2 expression changes |             |                    |                        | WT con  |      | WT heat |      | WT recovery |      | <i>nrrpd2</i> con |      | <i>nrrpd2</i> heat |      | <i>nrrpd2</i> recovery |      |
|-----------------------|-------------------------|-------------|--------------------|------------------------|---------|------|---------|------|-------------|------|-------------------|------|--------------------|------|------------------------|------|
|                       | WT heat                 | WT recovery | <i>nrrpd2</i> heat | <i>nrrpd2</i> recovery | average | s.d. | average | s.d. | average     | s.d. | average           | s.d. | average            | s.d. | average                | s.d. |
| AT1G03400             | -2.4                    | -1.0        | -2.1               | -0.4                   | 7.7     | 0.1  | 5.3     | 5.3  | 6.7         | 0.4  | 7.5               | 0.3  | 5.4                | 0.7  | 7.1                    | 0.1  |
| AT1G30790             | 0.28                    | 0.1         | 0.3                | 0.0                    | 2.9     | 0.0  | 3.2     | 3.2  | 3.0         | 0.2  | 3.0               | 0.1  | 3.2                | 0.2  | 3.0                    | 0.1  |
| AT1G58400             | no probe                | -           | -                  | -                      | -       | -    | -       | -    | -           | -    | -                 | -    | -                  | -    | -                      | -    |
| AT1G66050             | no probe                | -           | -                  | -                      | -       | -    | -       | -    | -           | -    | -                 | -    | -                  | -    | -                      | -    |
| AT2G02700             | 0.28                    | 0.0         | 0.3                | 0.1                    | 2.7     | 0.1  | 3.0     | 3.0  | 2.8         | 0.2  | 2.7               | 0.0  | 3.0                | 0.3  | 2.7                    | 0.1  |
| AT2G36270             | 0.50                    | 0.1         | 0.5                | -0.3                   | 4.1     | 0.2  | 4.6     | 4.6  | 4.2         | 0.2  | 4.2               | 0.3  | 4.7                | 0.1  | 3.9                    | 0.0  |
| AT2G43570             | -1.99                   | 2.9         | -0.5               | 4.5                    | 5.9     | 0.7  | 4.0     | 4.0  | 8.9         | 0.6  | 5.3               | 1.9  | 4.8                | 0.4  | 9.9                    | 0.5  |
| AT3G01015             | 0.15                    | 0.0         | 0.4                | -0.2                   | 2.6     | 0.1  | 2.8     | 2.8  | 2.7         | 0.0  | 2.7               | 0.1  | 3.1                | 0.3  | 2.6                    | 0.1  |
| AT3G04945             | no probe                | -           | -                  | -                      | -       | -    | -       | -    | -           | -    | -                 | -    | -                  | -    | -                      | -    |
| AT3G13810             | -2.5                    | 0.0         | -1.9               | 0.3                    | 5.7     | 0.2  | 3.2     | 3.2  | 5.7         | 0.3  | 5.5               | 0.1  | 3.5                | 0.2  | 5.8                    | 0.3  |
| AT3G19500             | 0.19                    | 0.1         | 0.1                | -0.1                   | 3.5     | 0.1  | 3.7     | 3.7  | 3.7         | 0.2  | 3.8               | 0.1  | 3.9                | 0.2  | 3.6                    | 0.0  |
| AT3G25180             | 0.50                    | 0.1         | 0.4                | 0.5                    | 3.1     | 0.0  | 3.6     | 3.6  | 3.2         | 0.1  | 3.1               | 0.3  | 3.5                | 0.6  | 3.6                    | 0.4  |
| AT4G01930             | 0.18                    | 0.2         | 0.0                | 0.0                    | 2.7     | 0.1  | 2.9     | 2.9  | 2.8         | 0.1  | 2.8               | 0.1  | 2.9                | 0.2  | 2.8                    | 0.1  |
| AT4G23160             | no probe                | -           | -                  | -                      | -       | -    | -       | -    | -           | -    | -                 | -    | -                  | -    | -                      | -    |
| AT5G02160             | 0.39                    | 0.8         | 0.4                | -0.1                   | 9.6     | 0.2  | 9.9     | 9.9  | 10.4        | 0.5  | 9.4               | 0.2  | 9.8                | 0.3  | 9.3                    | 0.3  |
| AT5G38550             | no probe                | -           | -                  | -                      | -       | -    | -       | -    | -           | -    | -                 | -    | -                  | -    | -                      | -    |
| AT5G54067             | no probe                | -           | -                  | -                      | -       | -    | -       | -    | -           | -    | -                 | -    | -                  | -    | -                      | -    |
| AT5G59070             | 0.07                    | 0.1         | 0.2                | 0.0                    | 3.1     | 0.2  | 3.2     | 3.2  | 3.2         | 0.1  | 3.2               | 0.1  | 3.4                | 0.3  | 3.1                    | 0.1  |
| AT5G59590             | 0.1                     | 0.0         | 0.5                | 0.0                    | 3.2     | 0.0  | 3.3     | 3.3  | 3.2         | 0.2  | 3.2               | 0.1  | 3.6                | 0.1  | 3.1                    | 0.2  |
| AT5G65310             | -1.5                    | 1.1         | -1.6               | 0.0                    | 4.2     | 0.1  | 2.7     | 2.7  | 5.3         | 0.7  | 4.5               | 0.2  | 2.9                | 0.0  | 4.5                    | 0.6  |

| 19_4<br>Inserted loci | Log2 expression changes |             |                    |                        | WT con  |      | WT heat |      | WT recovery |      | <i>nrrpd2</i> con |      | <i>nrrpd2</i> heat |      | <i>nrrpd2</i> recovery |      |
|-----------------------|-------------------------|-------------|--------------------|------------------------|---------|------|---------|------|-------------|------|-------------------|------|--------------------|------|------------------------|------|
|                       | WT heat                 | WT recovery | <i>nrrpd2</i> heat | <i>nrrpd2</i> recovery | average | s.d. | average | s.d. | average     | s.d. | average           | s.d. | average            | s.d. | average                | s.d. |
| AT1G13920             | 0.3                     | -0.1        | 0.1                | -0.1                   | 2.9     | 0.1  | 3.3     | 3.3  | 2.8         | 0.1  | 3.0               | 0.2  | 3.1                | 0.1  | 3.0                    | 0.1  |
| AT1G29715             | no probe                | -           | -                  | -                      | -       | -    | -       | -    | -           | -    | -                 | -    | -                  | -    | -                      | -    |
| AT1G66400             | 2.3                     | 0.6         | 0.9                | 0.3                    | 3.5     | 0.3  | 5.8     | 5.8  | 4.1         | 0.1  | 3.5               | 0.2  | 4.3                | 0.1  | 3.7                    | 0.5  |
| AT1G70940             | -2.8                    | -1.0        | -2.5               | -0.8                   | 8.1     | 0.1  | 5.3     | 5.3  | 7.2         | 0.4  | 7.8               | 0.2  | 5.3                | 0.6  | 7.0                    | 0.4  |
| AT1G73870             | -3.0                    | -1.1        | -2.9               | -1.4                   | 8.2     | 0.3  | 5.2     | 5.2  | 7.0         | 0.2  | 7.9               | 0.3  | 4.9                | 0.3  | 6.5                    | 0.3  |
| AT1G76230             | 0.3                     | 0.1         | 0.3                | 0.1                    | 2.3     | 0.0  | 2.5     | 2.5  | 2.4         | 0.0  | 2.3               | 0.2  | 2.6                | 0.1  | 2.4                    | 0.1  |
| AT2G35810             | no probe                | -           | -                  | -                      | -       | -    | -       | -    | -           | -    | -                 | -    | -                  | -    | -                      | -    |
| AT2G40220             | 0.1                     | 0.0         | 0.2                | -0.2                   | 3.8     | 0.1  | 3.9     | 3.9  | 3.8         | 0.1  | 3.8               | 0.1  | 4.1                | 0.1  | 3.6                    | 0.2  |
| AT3G47150             | no probe                | -           | -                  | -                      | -       | -    | -       | -    | -           | -    | -                 | -    | -                  | -    | -                      | -    |
| AT4G16550             | no probe                | -           | -                  | -                      | -       | -    | -       | -    | -           | -    | -                 | -    | -                  | -    | -                      | -    |
| AT4G24430             | -0.1                    | 0.2         | 0.1                | 0.1                    | 3.0     | 0.2  | 2.9     | 2.9  | 3.1         | 0.2  | 3.1               | 0.1  | 3.1                | 0.4  | 3.2                    | 0.2  |
| AT4G25330             | 0.1                     | -0.1        | 0.3                | 0.0                    | 2.8     | 0.1  | 2.9     | 2.9  | 2.7         | 0.1  | 2.6               | 0.1  | 2.9                | 0.1  | 2.7                    | 0.1  |
| AT5G63710             | -1.1                    | -0.5        | -1.4               | -0.5                   | 5.3     | 0.2  | 4.2     | 4.2  | 4.8         | 0.2  | 5.1               | 0.3  | 3.7                | 0.3  | 4.6                    | 0.2  |



Supplementary Table S5. Gene expression of *ONSEN*-inserted loci during flower development

| T3_7<br>Inserted loci | Ratio compared with 0d |         |       |         |       |         |       |         |       |       |       |        |        | 0d<br>average s.d. | 1d      |      | 1.5d    |      | 2d      |      | 2.5d    |      | 3d      |      | 3.5d    |      | 4d      |      | 4.5d    |      | 5d      |      | 7d      |      | 9d      |      | 11d  |      | 13d  |      |     |
|-----------------------|------------------------|---------|-------|---------|-------|---------|-------|---------|-------|-------|-------|--------|--------|--------------------|---------|------|---------|------|---------|------|---------|------|---------|------|---------|------|---------|------|---------|------|---------|------|---------|------|---------|------|------|------|------|------|-----|
|                       | 1d/0d                  | 1.5d/0d | 2d/0d | 2.5d/0d | 3d/0d | 3.5d/0d | 4d/0d | 4.5d/0d | 5d/0d | 7d/0d | 9d/0d | 11d/0d | 13d/0d |                    | average | s.d. | average | s.d. | average | s.d. | average | s.d. | average | s.d. | average | s.d. | average | s.d. | average | s.d. | average | s.d. | average | s.d. | average | s.d. |      |      |      |      |     |
|                       | 1d                     | 1.5d    | 2d    | 2.5d    | 3d    | 3.5d    | 4d    | 4.5d    | 5d    | 7d    | 9d    | 11d    | 13d    |                    | average | s.d. | average | s.d. | average | s.d. | average | s.d. | average | s.d. | average | s.d. | average | s.d. | average | s.d. | average | s.d. | average | s.d. | average | s.d. |      |      |      |      |     |
| AT1033400             | -0.1                   | -0.1    | -0.1  | 0.0     | -0.1  | 0.0     | -0.1  | -0.2    | -0.1  | -0.3  | -0.2  | -0.2   | -0.3   | 0.2                | 0.1     | 0.1  | 0.1     | 0.1  | 0.1     | 0.1  | 0.1     | 0.1  | 0.1     | 0.1  | 0.2     | 0.3  | 0.1     | 0.1  | 0.0     | 0.2  | 0.0     | 0.2  | -0.2    | 0.1  | -0.1    | 0.1  | 0.0  | 0.1  | -0.2 | 0.1  |     |
| AT1130790             | 0.2                    | -0.1    | 0.1   | 0.1     | 0.3   | 0.3     | 0.0   | 0.1     | 0.2   | 0.2   | -0.9  | -0.4   | -0.2   | 0.2                | 0.1     | 0.3  | 0.1     | 0.1  | 0.1     | 0.2  | 0.3     | 0.3  | 0.1     | 0.5  | 0.3     | 0.4  | 0.0     | 0.1  | 0.1     | 0.3  | 0.2     | 0.3  | 0.1     | 0.4  | 0.0     | -0.8 | 0.2  | -0.3 | 0.2  | 0.0  | 0.0 |
| AT168400              | 0.0                    | 0.0     | 0.0   | 0.0     | -0.1  | -0.1    | 0.0   | 0.0     | 0.0   | 0.0   | 0.1   | 0.2    | 0.2    | 0.3                | -0.1    | 0.1  | -0.1    | 0.2  | -0.1    | 0.2  | -0.1    | 0.1  | -0.1    | 0.2  | -0.2    | 0.1  | -0.2    | 0.3  | -0.2    | 0.3  | 0.0     | 0.1  | 0.1     | 0.1  | 0.1     | 0.1  | 0.1  | 0.2  | 0.2  |      |     |
| AT1686050             | 0.0                    | -0.1    | 0.0   | 0.0     | 0.0   | 0.0     | 0.1   | 0.1     | 0.2   | 0.2   | 0.4   | 0.2    | 0.6    | -0.1               | 0.0     | -0.2 | 0.0     | -0.2 | 0.1     | -0.1 | 0.0     | -0.1 | 0.0     | -0.1 | 0.0     | -0.1 | 0.1     | 0.0  | 0.0     | 0.1  | 0.1     | 0.1  | 0.0     | 0.2  | 0.0     | 0.1  | 0.1  | 0.5  | 0.1  | 0.1  | 0.2 |
| AT2624750             | 0.0                    | 0.0     | 0.1   | 0.0     | 0.0   | 0.1     | 0.0   | 0.1     | 0.0   | 0.2   | 0.0   | 0.0    | 0.1    | 0.1                | 0.0     | 0.0  | 0.0     | 0.0  | 0.0     | 0.0  | 0.1     | 0.1  | 0.0     | 0.0  | 0.0     | 0.0  | 0.0     | 0.1  | 0.1     | 0.0  | 0.2     | 0.4  | 0.0     | 0.0  | 0.0     | 0.0  | 0.1  | 0.2  | 0.1  | 0.2  |     |
| AT2627700             | 0.0                    | 0.0     | 0.0   | -0.1    | 0.0   | 0.0     | 0.0   | 0.0     | 0.0   | 0.0   | 0.0   | 0.0    | 0.2    | 0.0                | 0.0     | 0.0  | 0.0     | 0.0  | 0.0     | 0.0  | 0.0     | 0.0  | 0.1     | 0.1  | 0.0     | 0.0  | 0.0     | 0.0  | 0.0     | 0.0  | 0.0     | 0.0  | 0.0     | 0.0  | 0.0     | 0.0  | 0.0  | 0.0  | 0.2  | 0.3  |     |
| AT2636270             | -0.1                   | -0.4    | -0.5  | -0.6    | -0.9  | -0.9    | -1.0  | -1.0    | -1.0  | -0.9  | -0.9  | -0.1   | -0.3   | 0.9                | 0.0     | 0.6  | 0.0     | 0.5  | 0.1     | 0.3  | 0.1     | 0.1  | 0.0     | 0.0  | 0.0     | 0.0  | -0.1    | 0.1  | -0.1    | 0.1  | -0.1    | 0.0  | 0.0     | 0.0  | 0.1     | -0.2 | 0.1  | -0.4 | 0.1  | -0.4 |     |
| AT2643570             | -0.2                   | -0.1    | 0.3   | 0.4     | 0.6   | 0.5     | 0.6   | 0.1     | 0.2   | -0.2  | -0.5  | -0.3   | -0.6   | 0.1                | 0.1     | -0.1 | 0.2     | 0.1  | 0.2     | 0.3  | 0.1     | 0.5  | 0.1     | 0.7  | 0.2     | 0.6  | 0.1     | 0.6  | 0.1     | 0.2  | 0.2     | 0.3  | 0.4     | -0.2 | 0.1     | -0.4 | 0.2  | -0.2 | 0.2  | -0.5 | 0.1 |
| AT3601015             | 0.0                    | 0.0     | 0.0   | 0.0     | 0.0   | 0.0     | 0.0   | 0.0     | -0.1  | -0.1  | 0.3   | 0.2    | -0.1   | -0.1               | 0.1     | -0.1 | 0.0     | -0.1 | 0.1     | -0.1 | 0.0     | -0.1 | 0.1     | -0.1 | 0.1     | -0.2 | 0.0     | -0.2 | 0.0     | -0.1 | 0.1     | -0.2 | 0.1     | -0.2 | 0.1     | 0.1  | 0.1  | 0.1  | -0.3 | 0.1  |     |
| AT3604845             | 0.1                    | 0.1     | 0.1   | 0.1     | 0.1   | 0.1     | 0.0   | 0.1     | 0.0   | 0.1   | -0.1  | 0.1    | 0.2    | -0.1               | 0.2     | 0.0  | 0.0     | 0.0  | 0.0     | -0.1 | 0.1     | -0.1 | 0.1     | 0.0  | 0.2     | -0.1 | 0.5     | -0.1 | 0.1     | 0.0  | 0.1     | -0.1 | 0.2     | -0.1 | 0.1     | -0.2 | 0.3  | 0.0  | 0.0  | 0.0  | 0.0 |
| AT3613810             | -0.1                   | -0.2    | -0.2  | -0.3    | -0.3  | -0.3    | -0.4  | -0.4    | -0.4  | -0.3  | -0.1  | 0.0    | -0.1   | 0.2                | 0.1     | 0.1  | 0.1     | 0.0  | 0.0     | -0.1 | 0.1     | -0.1 | 0.1     | -0.1 | 0.1     | -0.2 | 0.1     | -0.2 | 0.0     | -0.3 | 0.1     | -0.2 | 0.0     | 0.1  | 0.1     | 0.2  | 0.1  | 0.1  | 0.1  |      |     |
| AT3619500             | 0.1                    | 0.2     | 0.3   | 0.4     | 0.5   | 0.6     | 0.7   | 0.8     | 0.7   | 1.0   | 0.9   | 0.9    | 0.9    | -0.6               | 0.1     | -0.5 | 0.0     | -0.5 | 0.0     | -0.3 | 0.0     | -0.2 | 0.1     | -0.2 | 0.0     | 0.1  | 0.0     | 0.1  | 0.2     | 0.1  | 0.1     | 0.1  | 0.4     | 0.2  | 0.6     | 0.0  | 0.3  | 0.2  | 0.2  | 0.0  |     |
| AT3629180             | 0.1                    | 0.1     | 0.5   | 0.4     | 0.5   | 0.7     | 1.0   | 0.9     | 0.9   | 1.0   | 0.4   | -0.3   | -0.4   | -0.1               | 0.1     | 0.0  | 0.1     | 0.0  | 0.1     | 0.4  | 0.0     | 0.3  | 0.3     | 0.4  | 0.0     | 0.6  | 0.2     | 0.9  | 0.2     | 0.8  | 0.2     | 1.0  | 0.1     | 0.9  | 0.1     | 0.3  | 0.3  | -0.4 | 0.4  | -0.5 | 0.1 |
| AT4621930             | 0.1                    | 0.0     | 0.1   | 0.0     | -0.1  | -0.1    | 0.0   | 0.1     | 0.1   | 0.1   | 0.0   | 0.2    | 0.2    | -0.2               | 0.2     | -0.1 | 0.1     | -0.2 | 0.2     | -0.1 | 0.1     | -0.1 | 0.1     | -0.3 | 0.2     | -0.2 | 0.0     | -0.2 | 0.2     | -0.1 | 0.3     | -0.1 | 0.3     | -0.1 | 0.1     | 0.0  | 0.2  | 0.0  | 0.1  | 0.1  |     |
| AT4623160             | 0.0                    | 0.1     | 0.0   | 0.0     | 0.0   | -0.1    | 0.0   | 0.0     | -1.0  | -0.3  | 0.1   | -0.6   | 0.0    | 0.1                | 0.0     | 0.0  | 0.1     | 0.1  | 0.0     | 0.0  | 0.0     | 0.0  | 0.0     | 0.0  | 0.0     | 0.0  | -0.1    | 0.2  | 0.0     | 0.0  | 0.0     | 0.0  | -1.0    | 0.1  | -0.3    | 0.5  | 0.1  | 0.1  | -0.6 | 0.2  |     |
| AT5602180             | 0.0                    | 0.0     | 0.0   | 0.0     | 0.0   | -0.1    | -0.1  | -0.1    | -0.2  | -0.4  | -0.4  | -0.2   | 0.0    | 0.0                | 0.0     | 0.0  | 0.0     | 0.1  | 0.0     | 0.0  | 0.1     | 0.0  | 0.0     | 0.0  | 0.0     | 0.0  | 0.1     | 0.0  | 0.0     | 0.0  | -0.1    | 0.1  | -0.2    | 0.1  | -0.4    | 0.1  | -0.3 | 0.1  | -0.2 | 0.1  |     |
| AT5638550             | -0.1                   | -0.1    | -0.1  | -0.1    | -0.1  | 0.0     | -0.1  | -0.1    | -0.1  | -0.1  | 0.0   | -0.1   | -0.4   | 0.1                | 0.1     | 0.0  | 0.0     | 0.1  | -0.1    | 0.1  | -0.1    | 0.1  | -0.1    | 0.1  | -0.1    | 0.2  | -0.1    | 0.3  | 0.0     | 0.0  | 0.0     | -0.1 | 0.1     | 0.0  | 0.0     | 0.0  | 0.0  | 0.0  | 0.0  | -0.4 | 0.2 |
| AT564067              | 0.1                    | 0.1     | 0.1   | 0.1     | 0.1   | 0.1     | 0.1   | 0.1     | 0.1   | 0.1   | 0.1   | 0.1    | 0.1    | -0.1               | 0.1     | 0.0  | 0.0     | 0.0  | 0.0     | 0.0  | 0.0     | 0.0  | 0.0     | 0.0  | 0.0     | 0.0  | 0.0     | 0.0  | 0.0     | 0.0  | 0.0     | 0.0  | 0.0     | 0.0  | 0.0     | 0.0  | 0.0  | 0.0  | 0.0  | 0.0  |     |
| AT5659070             | -0.1                   | 0.0     | -0.1  | 0.0     | 0.1   | 0.1     | 0.3   | 0.3     | 0.4   | 0.3   | -0.3  | -0.6   | -1.0   | 0.3                | 0.1     | 0.2  | 0.2     | 0.3  | 0.2     | 0.2  | 0.1     | 0.3  | 0.1     | 0.4  | 0.0     | 0.4  | 0.1     | 0.6  | 0.2     | 0.6  | 0.1     | 0.6  | 0.1     | 0.6  | 0.2     | 0.0  | 0.4  | -0.3 | 0.2  | -0.7 | 0.1 |
| AT5659590             | 0.0                    | 0.1     | 0.0   | 0.0     | 0.0   | 0.1     | 0.2   | 0.0     | -0.2  | 0.0   | -0.6  | -0.9   | -0.2   | 0.3                | 0.1     | 0.3  | 0.1     | 0.3  | 0.1     | 0.2  | 0.0     | 0.3  | 0.1     | 0.3  | 0.1     | 0.4  | 0.1     | 0.5  | 0.1     | 0.3  | 0.1     | 0.1  | 0.1     | 0.2  | 0.1     | -0.4 | 0.4  | -0.7 | 0.1  | 0.1  |     |
| AT5665310             | -0.2                   | -0.2    | -0.2  | -0.2    | -0.2  | -0.2    | -0.2  | -0.2    | -0.1  | 0.0   | -0.1  | -0.2   | -0.4   | 0.2                | 0.1     | 0.1  | 0.0     | 0.1  | 0.0     | 0.0  | 0.1     | 0.0  | 0.1     | 0.0  | 0.1     | 0.0  | 0.0     | 0.0  | 0.1     | 0.0  | 0.1     | 0.1  | 0.1     | 0.1  | 0.1     | 0.0  | 0.1  | 0.0  | 0.1  | -0.2 | 0.0 |

  

| T9_4<br>Inserted loci | Ratio compared with 0d |         |       |         |       |         |       |         |       |       |       |        |        | 0d<br>average s.d. | 1d      |      | 1.5d    |      | 2d      |      | 2.5d    |      | 3d      |      | 3.5d    |      | 4d      |      | 4.5d    |      | 5d      |      | 7d      |      | 9d      |      | 11d  |      | 13d  |      |     |
|-----------------------|------------------------|---------|-------|---------|-------|---------|-------|---------|-------|-------|-------|--------|--------|--------------------|---------|------|---------|------|---------|------|---------|------|---------|------|---------|------|---------|------|---------|------|---------|------|---------|------|---------|------|------|------|------|------|-----|
|                       | 1d/0d                  | 1.5d/0d | 2d/0d | 2.5d/0d | 3d/0d | 3.5d/0d | 4d/0d | 4.5d/0d | 5d/0d | 7d/0d | 9d/0d | 11d/0d | 13d/0d |                    | average | s.d. | average | s.d. | average | s.d. | average | s.d. | average | s.d. | average | s.d. | average | s.d. | average | s.d. | average | s.d. | average | s.d. | average | s.d. |      |      |      |      |     |
|                       | 1d                     | 1.5d    | 2d    | 2.5d    | 3d    | 3.5d    | 4d    | 4.5d    | 5d    | 7d    | 9d    | 11d    | 13d    |                    | average | s.d. | average | s.d. | average | s.d. | average | s.d. | average | s.d. | average | s.d. | average | s.d. | average | s.d. | average | s.d. | average | s.d. | average | s.d. |      |      |      |      |     |
| AT1613920             | 0.0                    | 0.0     | 0.0   | 0.0     | 0.0   | 0.1     | 0.1   | 0.1     | 0.0   | 0.1   | 0.0   | 0.0    | -0.1   | -0.1               | 0.1     | -0.1 | 0.1     | -0.1 | 0.0     | -0.1 | 0.1     | -0.1 | 0.0     | -0.1 | 0.0     | 0.0  | 0.0     | 0.0  | 0.1     | -0.1 | 0.1     | 0.0  | 0.0     | -0.1 | 0.1     | -0.1 | 0.1  | -0.1 | 0.1  | -0.2 | 0.1 |
| AT1629715             | -0.4                   | -0.2    | -0.1  | -0.2    | -0.3  | -0.3    | -0.2  | -0.4    | -0.3  | 0.0   | 0.3   | 0.4    | 0.3    | 0.0                | 0.3     | -0.4 | 0.0     | -0.2 | 0.1     | -0.1 | 0.1     | -0.2 | 0.1     | -0.3 | 0.0     | -0.2 | 0.1     | -0.1 | 0.1     | -0.3 | 0.0     | -0.2 | 0.2     | 0.0  | 0.1     | 0.3  | 0.3  | 0.5  | 0.0  | 0.4  | 0.3 |
| AT1684400             | 0.1                    | 0.2     | 0.0   | 0.0     | 0.1   | -0.1    | -0.1  | -0.2    | -0.2  | -0.2  | -1.1  | -0.4   | -0.7   | 0.3                | 0.1     | 0.3  | 0.0     | 0.4  | 0.2     | 0.2  | 0.1     | 0.3  | 0.0     | 0.3  | 0.1     | 0.2  | 0.0     | 0.1  | 0.1     | 0.0  | 0.0     | -0.9 | 0.2     | -0.2 | 0.1     | -0.1 | -0.4 | 0.0  | -0.4 | 0.0  |     |
| AT1670940             | 0.0                    | 0.1     | 0.0   | -0.1    | -0.2  | -0.2    | -0.3  | -0.4    | -0.5  | -0.5  | -0.4  | -0.6   | -0.1   | 0.4                | 0.1     | 0.4  | 0.1     | 0.5  | 0.1     | 0.4  | 0.1     | 0.3  | 0.1     | 0.2  | 0.1     | 0.2  | 0.0     | 0.1  | 0.0     | 0.0  | 0.0     | -0.1 | 0.0     | -0.1 | 0.1     | 0.0  | 0.1  | -0.2 | 0.0  | -0.7 | 0.1 |
| AT1673870             | 0.0                    | 0.1     | 0.0   | 0.0     | 0.0   | 0.1     | -0.3  | -0.3    | -0.8  | 1.4   | 1.6   | -1.6   | 0.9    | 0.1                | 0.9     | 0.1  | 0.9     | 0.2  | 0.9     | 0.2  | 0.9     | 0.1  | 0.9     | 0.1  | 0.9     | 0.2  | 0.9     | 0.0  | 0.6     | 0.1  | 0.6     | 0.1  | -0.1    | 0.1  | -0.5    | 0.1  | 0.7  | 0.2  | -0.7 | 0.1  |     |
| AT1676230             | -0.1                   | -0.1    | 0.0   | -0.2    | 0.1   | 0.1     | 0.0   | 0.0     | 0.0   | -0.1  | -0.4  | -0.2   | -0.2   | 0.0                | 0.1     | -0.2 | 0.1     | -0.1 | 0.2     | -0.1 | 0.1     | -0.2 | 0.6     | 0.0  | 0.1     | 0.0  | 0.0     | 0.0  | -0.1    | 0.1  | -0.1    | 0.2  | -0.2    | 0.1  | -0.5    | 0.1  | -0.2 | 0.1  | -0.2 | 0.1  |     |
| AT2635810             | 0.0                    | 0.0     | 0.0   | 0.0     | 0.0   | 0.0     | 0.0   | 0.0     | 0.0   | 0.0   | 0.0   | 0.0    | -0.1   | 0.0                | 0.1     | 0.0  | 0.0     | 0.0  | 0.0     | 0.0  | 0.1     | 0.0  | 0.0     | 0.0  | 0.0     | 0.0  | 0.0     | 0.0  | 0.0     | 0.0  | 0.0     | 0.0  | 0.0     | 0.0  | 0.0     | 0.0  | 0.0  | 0.0  | -0.1 | 0.0  |     |
| AT2640220             | -0.1                   | 0.0     | -0.3  | 0.1     | 0.0   | 0.0     | 0.0   | -0.5    | 0.0   | 0.1   | 0.1   | 0.1    | -0.1   | -0.1               | 0.2     | -0.2 | 0.4     | -0.1 | 0.2     | -0.4 | 0.5     | 0.0  | 0.0     | -0.1 | 0.2     | -0.1 | 0.2     | -0.1 | 0.2     | -0.6 | 0.5     | -0.1 | 0.3     | 0.0  | 0.1     | 0.0  | 0.0  | 0.1  | -0.2 | 0.1  |     |
| AT3647150             | 0.0                    | -0.1    | 0.0   | 0.0     | -0.2  | 0.0     | 0.0   | 0.0     | 0.0   | 0.0   | 0.0   | 0.0    | 0.1    | 0.0                | 0.0     | 0.0  | -0.1    | 0.1  | 0.0     | 0.0  | 0.0     | 0.0  | 0.0     | -0.2 | 0.3     | 0.0  | 0.0     | 0.0  | 0.0     | 0.0  | 0.0     | 0.0  | 0.0     | 0.0  | 0.0     | 0.0  | 0.0  | 0.0  | 0.1  | 0.1  |     |
| AT4616550             | -0.1                   | -0.3    | -0.6  | -0.8    | -0.9  | -1.0    | -1.1  | -1.1    | -1.2  | -1.2  | -0.5  | -0.2   | 0.1    | 0.8                | 0.1     | 0.7  | 0.1     | 0.5  | 0.1     | 0.2  | 0.1     | 0.0  | 0.1     | -0.1 | 0.0     | -0.2 | 0.1     | -0.3 | 0.1     | -0.3 | 0.0     | -0.4 | 0.0     | -0.4 | 0.0     | 0.3  | 0.1  | 0.6  | 0.0  | 0.9  | 0.0 |
| AT4624430             | -0.1                   | -0.2    |       |         |       |         |       |         |       |       |       |        |        |                    |         |      |         |      |         |      |         |      |         |      |         |      |         |      |         |      |         |      |         |      |         |      |      |      |      |      |     |

## Supplementary Table S6. Primer sequences.

| Target/Purpose                                     | Name                    | Primer                                                           |
|----------------------------------------------------|-------------------------|------------------------------------------------------------------|
| Southern probe                                     | ONSEN-F                 | TAA TGT TCC CTT CCA AGT CCC                                      |
|                                                    | ONSEN-R                 | GCT TGT AAT GAC CCA AGA AGT                                      |
| <i>ABI5</i> insertion PCR                          | AT2G36270-F             | CAC ACT CTC ACG GTG AGA ACA                                      |
|                                                    | AT2G36270-R             | TAC TTC TCG CTC TGA CGT CAA                                      |
| <i>ABI4</i> insertion PCR                          | <i>ABI4</i> down-F      | ACC TCC TCT TCC TCC ACT CAA                                      |
|                                                    | <i>ABI4</i> -R          | CCT CTG AAA CTC GAA CAA CCA                                      |
| 5' bisulfite PCR                                   | <i>ABI</i> BS F1        | GAT YTT GGA TTA GAA GAY TGT TAA ATA AAT                          |
|                                                    | COPIA78 BS R1           | AAA CCT TTC TCR ACT ATC TCC CAC ACR TCA T                        |
| 3' bisulfite PCR                                   | COPIA78 BS F1           | TTT ATY AAG ATG AGG AGT TTG YTT GGA GTA G                        |
|                                                    | <i>ABI</i> BS R1        | AAA ATA TCT TAA CCC ACT CRT TTT CTT CTT                          |
| <i>ABI4</i> q-RT-PCR                               | <i>ABI4</i> -qPCR_F     | GGG ACA ATT CCA ACA CCA ACA G                                    |
|                                                    | <i>ABI4</i> -qPCR_R     | GAA CAT ACC GGA TCA ACC AAC G                                    |
| <i>ABI5</i> q-RT-PCR                               | <i>ABI5</i> qPCR-LP     | AAA TTG CCG AAA TCG AAC AG                                       |
|                                                    | <i>ABI5</i> qPCR-RP     | TTT TCC CTC GTT CTG TCT CC                                       |
| <i>ABI5</i> q-RT-PCR on the <i>ONSEN</i> insertion | <i>ABI5</i> _qRTPCR_2-F | ACA CAA AGC CAC CGG TTT TTA                                      |
|                                                    | <i>ABI5</i> _qRTPCR_2-R | AAC GGA TGA TTC TCA CCA CCA                                      |
| <i>ABI5</i> 1 <sup>st</sup> intron OneStep RT-PCR  | <i>ABI5</i> cDNA-F      | TTC AGT CAA AAT TCT CCG GC                                       |
|                                                    | <i>ABI5</i> cDNA-R      | TAA AGA CAC CAA CAC CAC CCT                                      |
| 3'RACE RT                                          | oligodT T7 2-3          | CAG TGA ATT GTA ATA CGA CTC ACT ATA GGN VTT<br>TTT TTT TTT TTT T |
| 3'RACE 1 <sup>st</sup> primer                      | T7-3 primer             | TTC CTC ATC AAT GTC CGA A                                        |
| 3'RACE 2 <sup>nd</sup> primer                      | T7-2 primer             | TTG TAA TAC GAC TCA CTA TAG G                                    |
| Gene specific 1 <sup>st</sup> primer               | <i>ABI5</i> 1st         | CGG CTT TTA AAC TAT GTG AAG G                                    |
| Gene specific 2 <sup>nd</sup> primer               | <i>ABI5</i> 2nd         | CCA TAA CAA GAA GCG GAT TCT C                                    |
| <i>ONSEN</i> copy in <i>ABI4</i>                   | AT2G40220-F             | CAA CAT CTT CCT TAA TGG TGG GA                                   |
|                                                    | CopiaMix-R              | TGA TCT CAA TTC TTC AAT CG                                       |
| <i>ONSEN</i> copy in <i>ABI5</i>                   | AT2G36270seq-part2F     | TGA AGG AGG AGA ACC TCC ATA                                      |
|                                                    | CopiaMix-R              | TGA TCT CAA TTC TTC AAT CG                                       |
